# Supplementary material for: Low energy consumption phosphorescent organic light-emitting diodes using phenyl anthracenone derivatives as the host featuring bipolar and thermally activated delayed fluorescence
Source: Royal Society of Chemistry journal article supplement (doi:10.1039/c8ra10658d), 2019-01-01
Supplement: c8ra10658d1.pdf [file c8ra10658d1.pdf]

## Low energy consumption phosphorescent organic light-emitting diodes using phenyl anthracenone derivatives as host featuring bipolar and thermally activated delayed fluorescence

Zhonghua Ye , Zhitian Ling , Minyu Chen , Jiali Yang , Shuanglong Wang , Yanqiong Zheng , Bin Wei , Chong Li , Guo Chen , Ying Shi

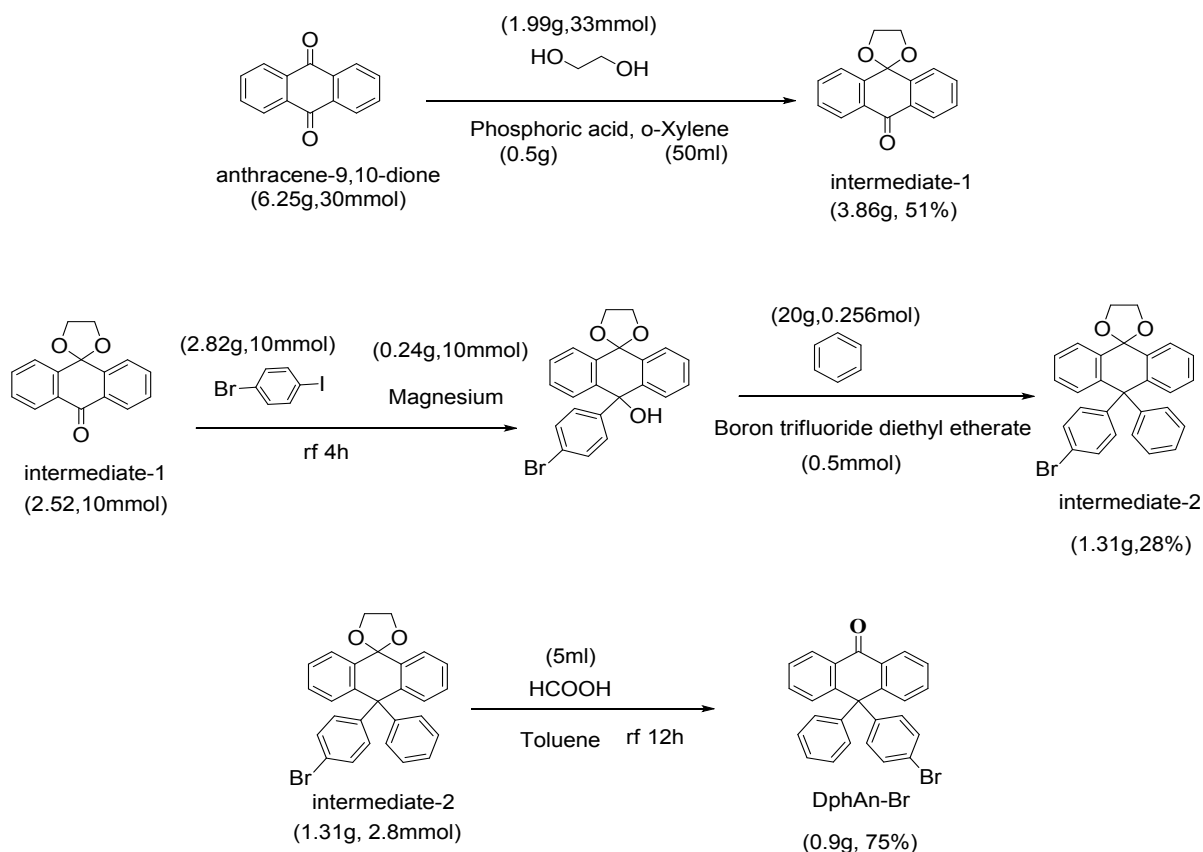

Scheme. S1 The synthetic route of DphAn-Br.

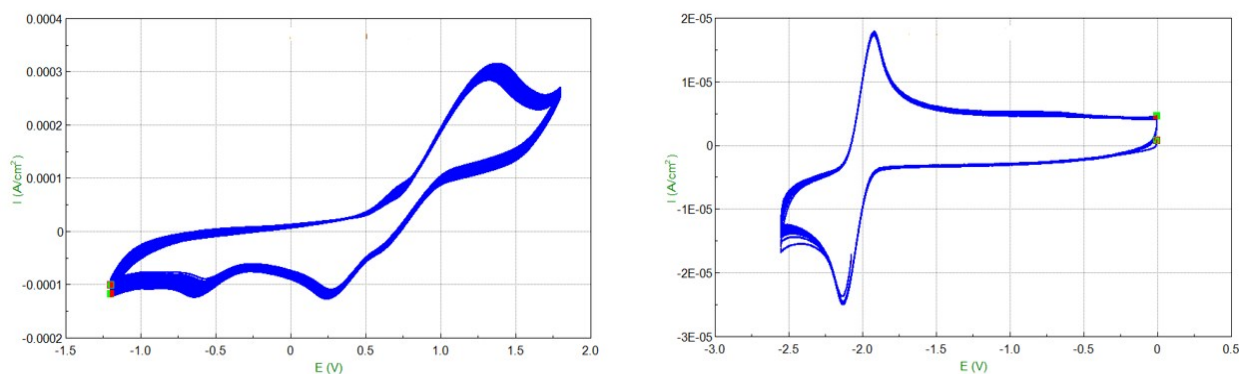

Fig. S1 Cyclic Voltammograms curves of DphAn-5BzAc: Oxidation potential (left) and Reduction potential(right).

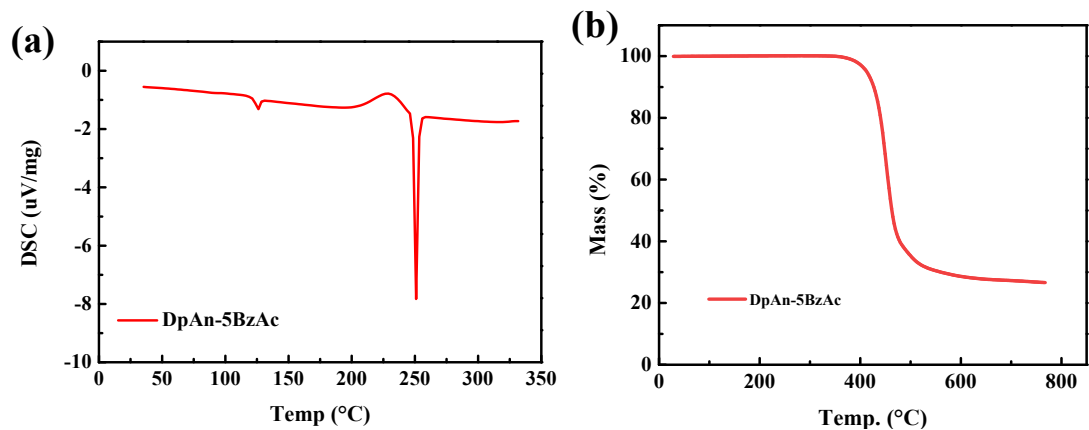

Fig. S2 Differential scanning calorimeter (DSC) curve and thermal gravimetric analysis (TGA) curve of DpAn-5BzAc.

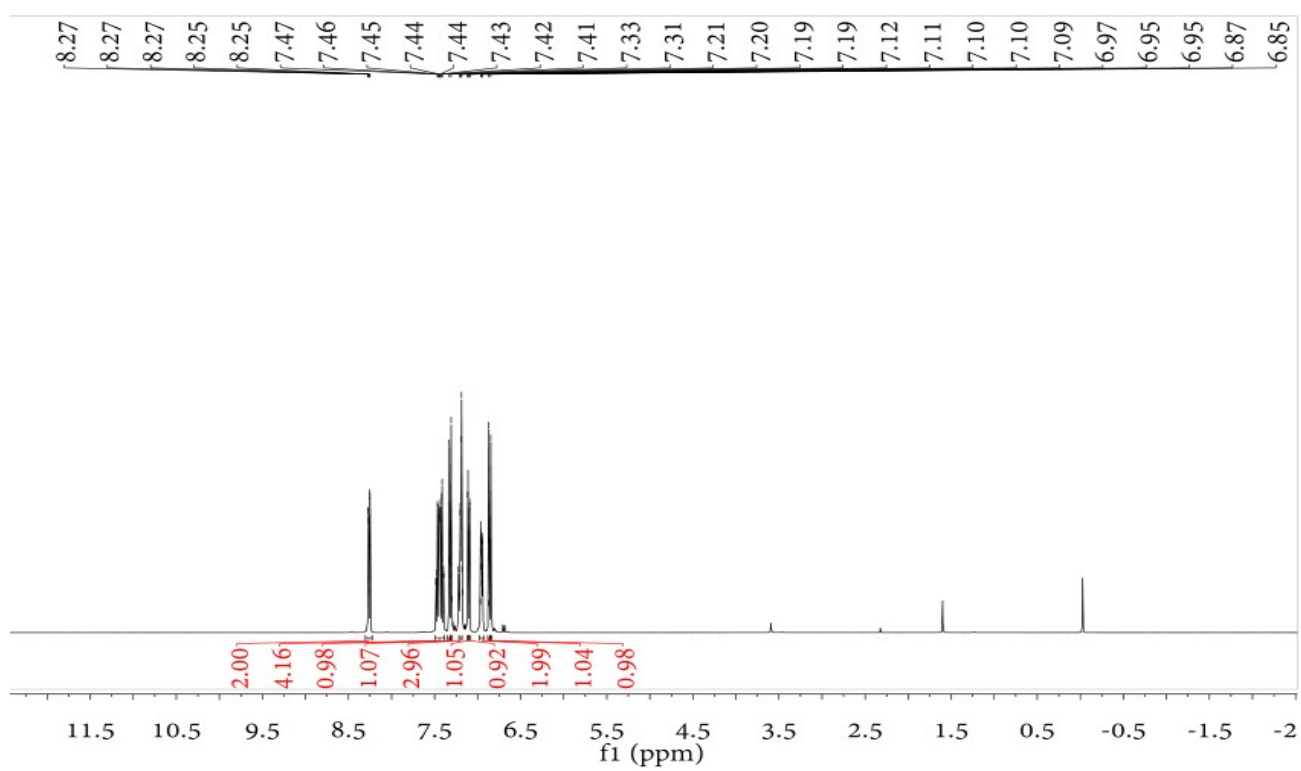

Fig. S3 The  $^1\text{H}$  NMR spectra of DpAn-Br.

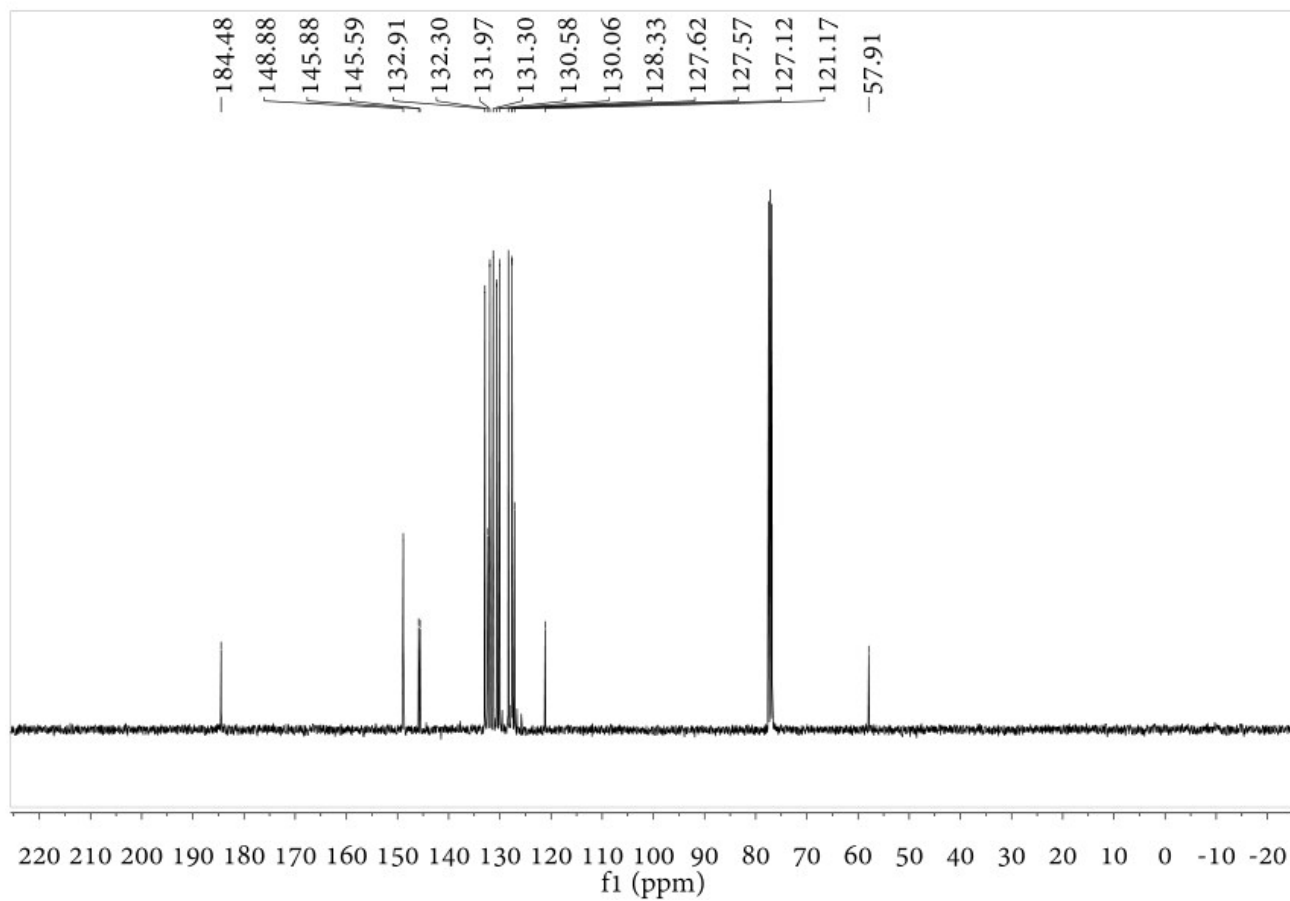

Fig. S4. The  $^{13}\text{C}$  NMR spectra of DphAn-Br.

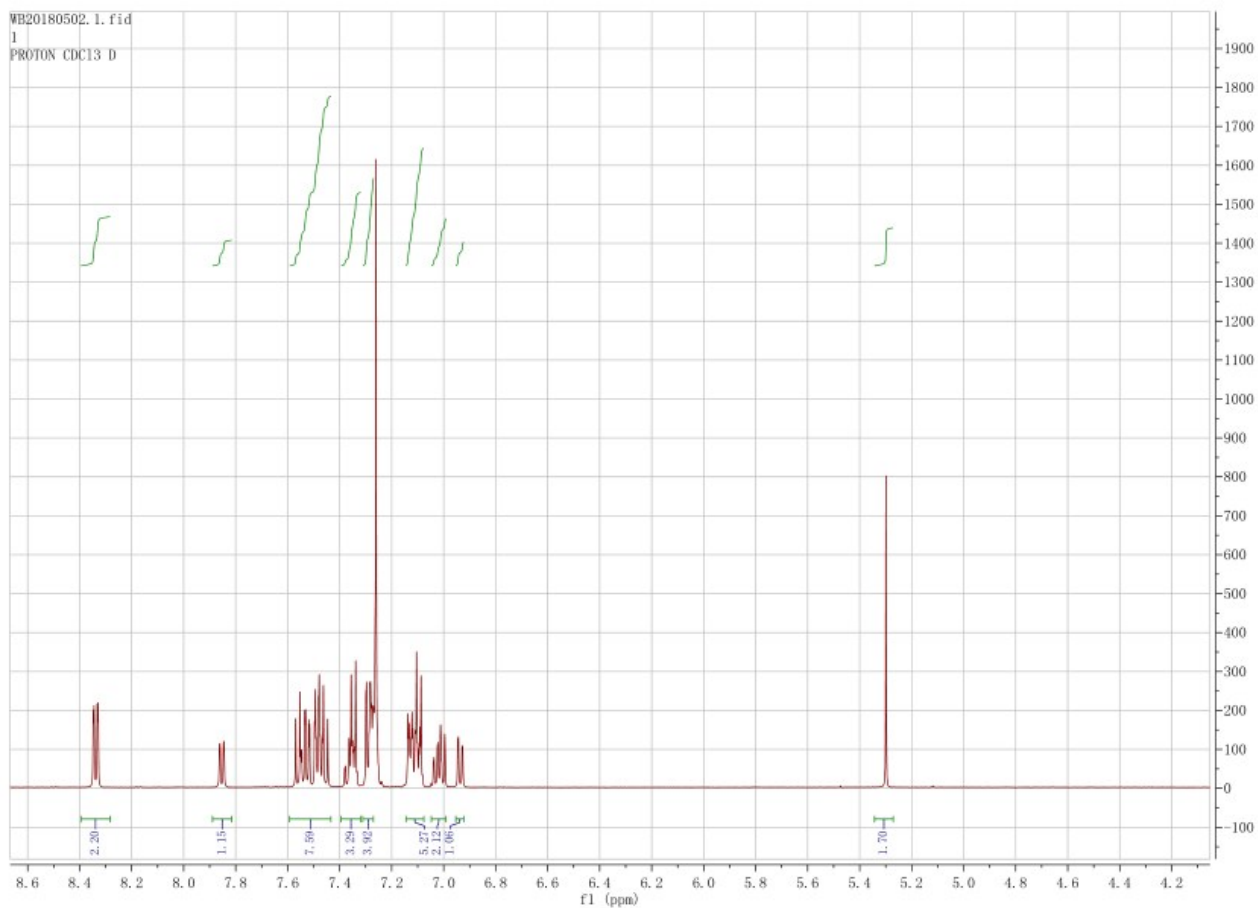

Fig. S5. The  $^1\text{H}$  NMR spectra of DphAn-5BzAc.

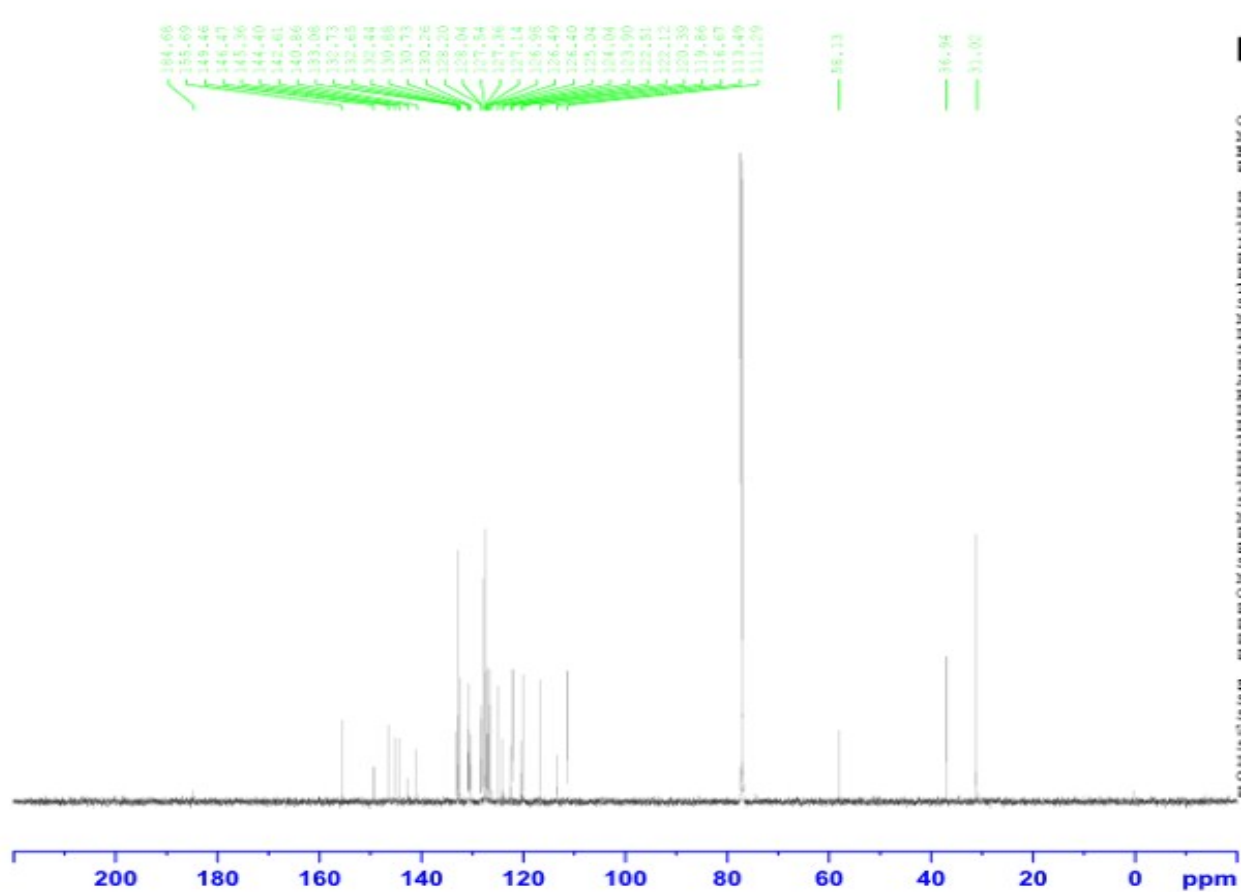

Fig. S6. The  $^{13}\text{C}$  NMR spectra of DphAn-5BzAc.
